# Supplementary material for: Exploring the pathology of an epidermal disease affecting a circum-Antarctic sea star
Source: PubMed Central journal article supplement (PMC6063859; doi:10.1038/s41598-018-29684-0), 2018-07-27
Supplement: 41598_2018_29684_MOESM2_ESM.pdf [file 41598_2018_29684_MOESM2_ESM.pdf]

# Exploring the pathology of an epidermal disease affecting a circum- Antarctic sea star

Laura Núñez-Pons<sup>1,2\*</sup>, Thierry M. Work<sup>3</sup>, Carlos Angulo-Preckler<sup>4</sup>, Juan Moles<sup>5</sup>, Conxita Avila<sup>4</sup>

## Electronic Supplementary material:

### RESULTS SECTION.

Results of the most descriptive bacterial and fungal OTUs in defining the different tissue types in *Odontaster validus* disease.

#### **16S rRNA gene bacterial OTUs contribution.**

Several of these most discriminating OTUs were exclusive to Healthy samples; e.g., B\_OTU325 (*Azovibrio* sp.), B\_OTU60 and B\_OTU352 (*Clostridium* spp.), B\_OTU309 (Comamonadaceae sp.), B\_OTU188 (*Porphyromonadaceae bacterium NM7*), B\_OTU194 (*Acidaminobacter* sp.), B\_OTU132 (*Zoogloea* sp. UNPF36), B\_OTU210 (*Pelosinus* sp.) and B\_OTU14 (*Azospira* sp.). Others were largely correlated to Healthy (B\_OTU299 –*Colwellia* sp.) or also NON\_Affected tissues, e.g., B\_OTU28 (Rhodobacteraceae sp., B\_OTU625 (*Fabibacter* sp.) and B\_OTU625 (*Fabibacter* sp.). B\_OTU124 (*Polaribacter* sp.) was more common in lesion fronts. Finally, there were two OTUs highly descriptive for NON\_Affected sections (e.g., B\_OTU190 –*Roseobacter* clade NAC11-7 and B\_OTU159 –*Sulfitobacter* sp.), while B\_OTU338 (*Acinetobacter* sp.), B\_OTU247 (*Bacillus firmus*) and B\_OTU32 (*Geobacillus stearothermophilus*) were similarly contributing to all health states (Fig. S3A and Table S1).

#### **ITS rRNA gene fungal OTUs contribution.**

The most represented OTU was F\_OTU573 –Eurotiales sp. (17.92% in NON\_Affected, 19.46% in Healthy and 22.75% in Affected). There were OTUs more related to disease lesion

fronts, a few being exclusive (F\_OTU520, F\_OTU165 –*Trichosporon guehoae*, and F\_OTU450), whereas others were defining (F\_OTU556 –Eurotiales sp., F\_OTU514 –*Rhodotorula mucilaginosa*, F\_OTU199 –*Candida parapsilosis*, F\_OTU486 –Polyporales sp., F\_OTU157 –*Rhodospiridium babjevae*, F\_OTU581 –Tremellales sp., F\_OTU476 –*Penicillium multicolor*, F\_OTU569 –*Microporus affinis*, F\_OTU548 –*Cyberlindnera jadinii*, F\_OTU551 –*Malassezia restricta*, F\_OTU530 –Nectriaceae sp., F\_OTU115 –*Penicillium bialowiezense*, F\_OTU33 –*Cryptococcus diffluens*, F\_OTU –*Penicillium glandicola*, F\_OTU55, F\_OTU543 –*Sistotremastrum guttuliferum*). Healthy tissue samples harboured the highest incidence of exclusive OTUs (i.e., F\_OTU536 – Hypocreales sp., F\_OTU482 –*Phaeococcomyces nigricans*, F\_OTU327 –*Cryptococcus antarcticus*, F\_OTU500, F\_OTU483, F\_OTU485, F\_OTU531 –*Periconia* sp., F\_OTU571 – *Ceratobasidium* sp.); and had also defining OTUs (F\_OTU539, F\_OTU565 – *Scopuloides hydnoides*, F\_OTU474 –*Pyrenochaetopsis leptospora*, F\_OTU499 –*Cryptococcus magnus*, F\_OTU566 – *Glaciozyma martini*, F\_OTU568 –*Aureobasidium pullulans*, F\_OTU513 –*Mrakia frigida*, F\_OTU502, F\_OTU549, F\_OTU369 –*Polychaeton citri*). Among the OTUs mostly associated to apparently healthy NON\_Affected tissues from diseased sea stars, a few were exclusive (F\_OTU477 –Pleosporales sp., F\_OTU160 and F\_OTU116 –*Monographella cucumerina*); whereas others were defining (F\_OTU564, F\_OTU578 –Sordariomycetes sp., F\_OTU497, F\_OTU538 – *Candida sake*, F\_OTU559 –*Debaryomyces nepalensis*, F\_OTU528, F\_OTU475 –*Trichosporon asahii*, F\_OTU553, F\_OTU182 –Hypocreales sp., F\_OTU323 –*Devriesia lagerstroemiae*, F\_OTU563, F\_OTU572 –*Candida orthopsilosis*, F\_OTU464 –*Aspergillus gracilis*, F\_OTU19 –*Wallemia mellicola*). Certain OTUs were associated to Healthy and apparently healthy NON\_Affected tissues (F\_OTU526, F\_OTU503, F\_OTU575 –*Phellinus gilvus*, F\_OTU11 –*Candida norvegica*). Finally, there were OTUs more related to tissues from diseased sea stars (both, NON\_Affected and Affected), than to samples (Healthy) coming from healthy individuals; e.g., F\_OTU509 –*Aspergillus austroafricanus* (Fig. S3B and Table S2).
